# Supplementary material
Source: publisher site journal article supplement (https://www.dovepress.com/article/255117)

**Supplementary Table S1** Correlation between Tim-1 expression and clinicopathology of gliomas.

| Clinicopathological features | Patients<br>(n) | Tim-1 (Mean value 3.89) |          | <i>p</i> value |
|------------------------------|-----------------|-------------------------|----------|----------------|
|                              |                 | Low (n)                 | High (n) |                |
| Age                          |                 |                         |          | 0.381          |
|                              | < 50 y          | 29                      | 14       | 15             |
|                              | ≥ 50 y          | 39                      | 23       | 16             |
| Sex                          |                 |                         |          | 0.592          |
|                              | Male            | 46                      | 24       | 22             |
|                              | Female          | 22                      | 13       | 9              |
| WHO grade                    |                 |                         |          | 0.002**        |
|                              | I~II            | 29                      | 22       | 7              |
|                              | III~IV          | 39                      | 15       | 24             |
| Tumor size                   |                 |                         |          | 0.874          |
|                              | < 5 cm          | 38                      | 21       | 17             |
|                              | ≥ 5 cm          | 30                      | 16       | 14             |
| Karnofsky                    |                 |                         |          | 0.233          |
|                              | < 70            | 63                      | 33       | 30             |
|                              | ≥ 70            | 5                       | 4        | 1              |

\*\**p* < 0.01

## Supplementary Fig S1

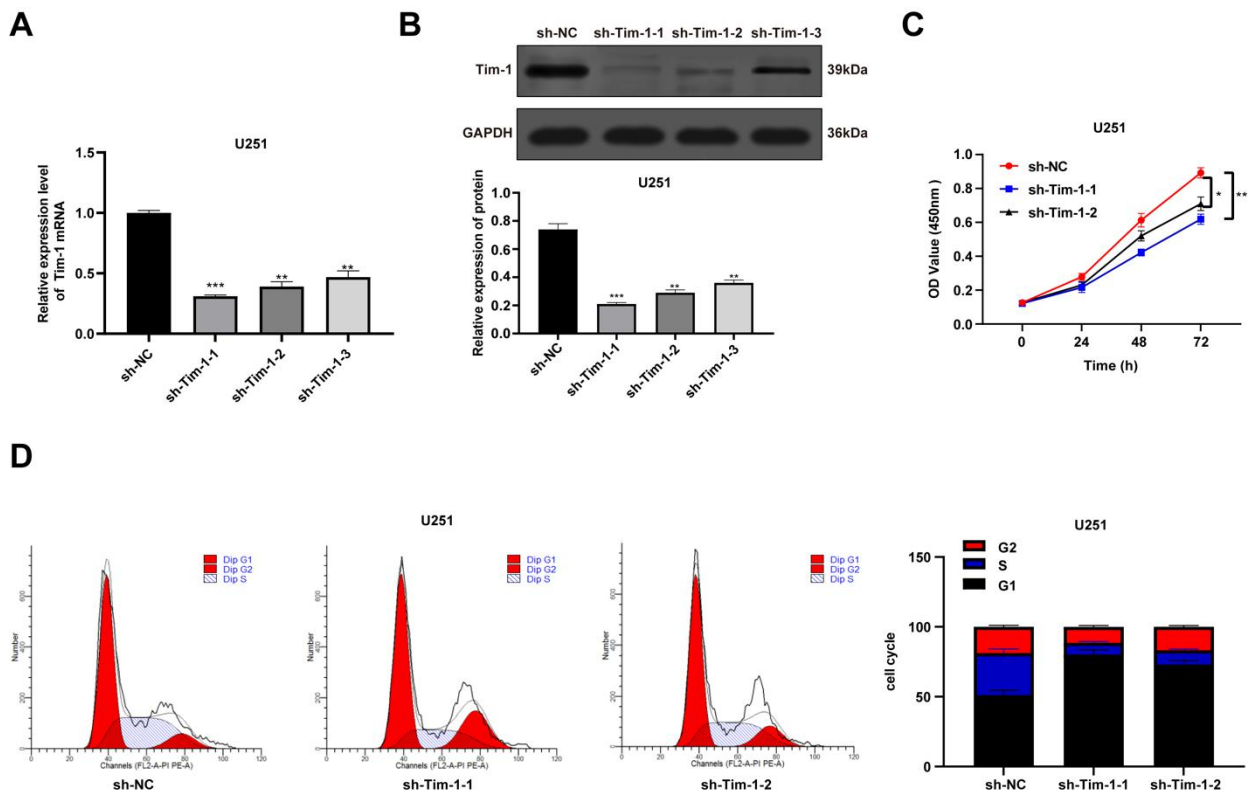

**Supplementary Fig S1** A-B, Tim-1 levels in glioma cells after Tim-1 was knocked down detected by RT-qPCR and Western blot analysis; C, OD values in U87 and U251 cells detected by CCK-8 assay; D, cell cycle detected by flow cytometry; \*\*\* $p < 0.001$ , \*\* $p < 0.01$ . Replicates = 3. Data in panels C and D were processed with two-way ANOVA, and data in panel A and B were processed with one-way ANOVA, followed by Tukey's multiple comparisons test.

## Supplementary information 1 the STR analysis of U87 cells

# Cell Line Authentication – STR Profiling

Sample from: FuHeng Cell Center, Shanghai, China

Testing Method: STR Genotyping

Report Time: Mar 22, 2019

### Cell Line Authentication – STR Profiling Report

Sample code

Table 1. Sample Code

| Customer's code | Company Code |
|-----------------|--------------|
| U87             | 20190314-01  |

Sample Number: 1

Sample Type: Cell line

Testing Type: STR

Sample From: FuHeng Cell Center, Shanghai, China

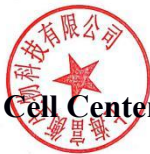

### Testing Method:

DNA was extracted by a commercial kit from CORNING (AP-EMN-BL-GDNA-250G). The twenty STRs including Amelogenin locus were amplified by six multiplex PCR and separated on ABI 3730XL Genetic Analyzer. The signals were then analyzed by the software GeneMapper.

### Data Interpretation:

Cell lines were authenticated using Short Tandem Repeat (STR) analysis as described in 2012 in ANSI Standard (ASN-0002) by the ATCC Standards Development Organization (SDO) and in Capes-Davis et al., Match criteria for human cell line authentication: Where do we draw the line?Int J Cancer.2013;132(11):2510-9.

## Test Results:

### 1. Result

**Table 2.** Matching information on the cell lines

| Sample Code | Multi-allele | Cell line matched | Cell Bank |
|-------------|--------------|-------------------|-----------|
| 20190314-01 | NO           | U87MG             | ATCC      |

**Multi-allele means some STR contain more than two loci.**

### 2. Sample Description

20190314-01 The DNA of the cell lines found to basic match the type of cell lines in a cell lineretrieval,ATCC database shows that cells called **U-87MG** corresponding to the cell number **HTB-14**. No multiple alleles were found in this cell line.

### 3. Genotyping Result

| STR and Amelogenin Genotyping Results of Cell line 20190314-01 |            |         |         |                               |         |         |
|----------------------------------------------------------------|------------|---------|---------|-------------------------------|---------|---------|
| Loci                                                           | Sample:u87 |         |         | Cell Bank information: U-87MG |         |         |
|                                                                | Allele1    | Allele2 | Allele3 | Allele1                       | Allele2 | Allele3 |
| D5S818                                                         | 11         | 12      |         | 11                            | 12      |         |
| D13S317                                                        | 8          | 11      |         | 8                             | 11      |         |
| D7S820                                                         | 8          | 9       |         | 8                             | 9       |         |
| D16S539                                                        | 12         | 12.3    |         | 12                            | 12      |         |
| VWA                                                            | 15         | 17      |         | 15                            | 17      |         |
| THO1                                                           | 9.3        | 9.3     |         | 9.3                           | 9.3     |         |

|         |      |      |    |    |    |  |
|---------|------|------|----|----|----|--|
| AMEL    | X    | Y    |    | X  | X  |  |
| TPOX    | 8    | 8    |    | 8  | 8  |  |
| CSF1PO  | 10   | 11   |    | 10 | 11 |  |
| D12S391 | 18   | 21   |    | 18 | 21 |  |
| FGA     | 18   | 24   |    |    |    |  |
| D2S1338 | 20   | 23   |    |    |    |  |
| D21S11  | 33.2 | 36.2 |    |    |    |  |
| D18S51  | 13   | 13   |    |    |    |  |
| D8S1179 | 8.3  | 8.3  |    |    |    |  |
| D3S1358 | 16   | 16.2 | 17 |    |    |  |
| D6S1043 | 11   | 11   |    |    |    |  |
| PENTAE  | 7    | 11   | 14 |    |    |  |
| D19S433 | 15   | 15.2 |    |    |    |  |
| PENTAD  | 9    | 14   |    |    |    |  |
|         |      |      |    |    |    |  |

## Others

### 1. Genotyping Strategy and Site Distribution Attached Table. Experimental Strategy and Sites

|   | Strategy 1 | Strategy 2 | Strategy 3 | Strategy 4 |
|---|------------|------------|------------|------------|
| 1 | TH01       | TPOX       | D3S1358    | AMEL       |
| 2 | D12S391    | VWA        | D13S317    | D5S818     |
| 3 | D7S820     | D8S1179    | D6S1043    | D2S1338    |

|   |        |        |         |        |
|---|--------|--------|---------|--------|
| 4 | CSF1PO | PENTAD | D16S539 | D21S11 |
| 5 | FGA    |        | D19S433 | D18S51 |
| 6 | PENTAE |        |         |        |

The allele match algorithm compares the 8 core loci plus amelogenin only, even though alleles from all loci will be reported when available.

## 2. STR database comparison

DSMZ tools was used to carry on the cell line comparison, which contains 2455 cell lines STR data from ATCC, DSMZ, JCRB ,ECACC and RIKEN databases. If the cell is not included in the above cell library, users need to compared with other databases.

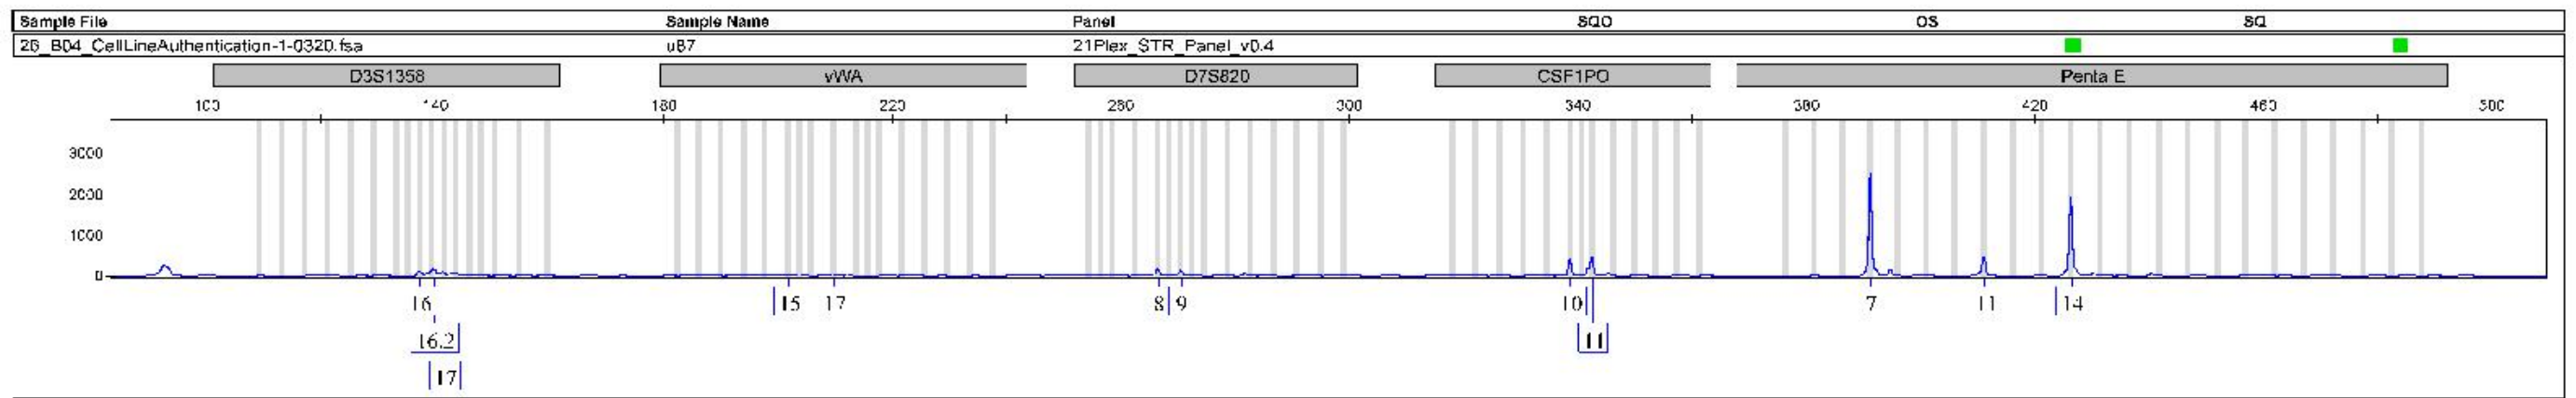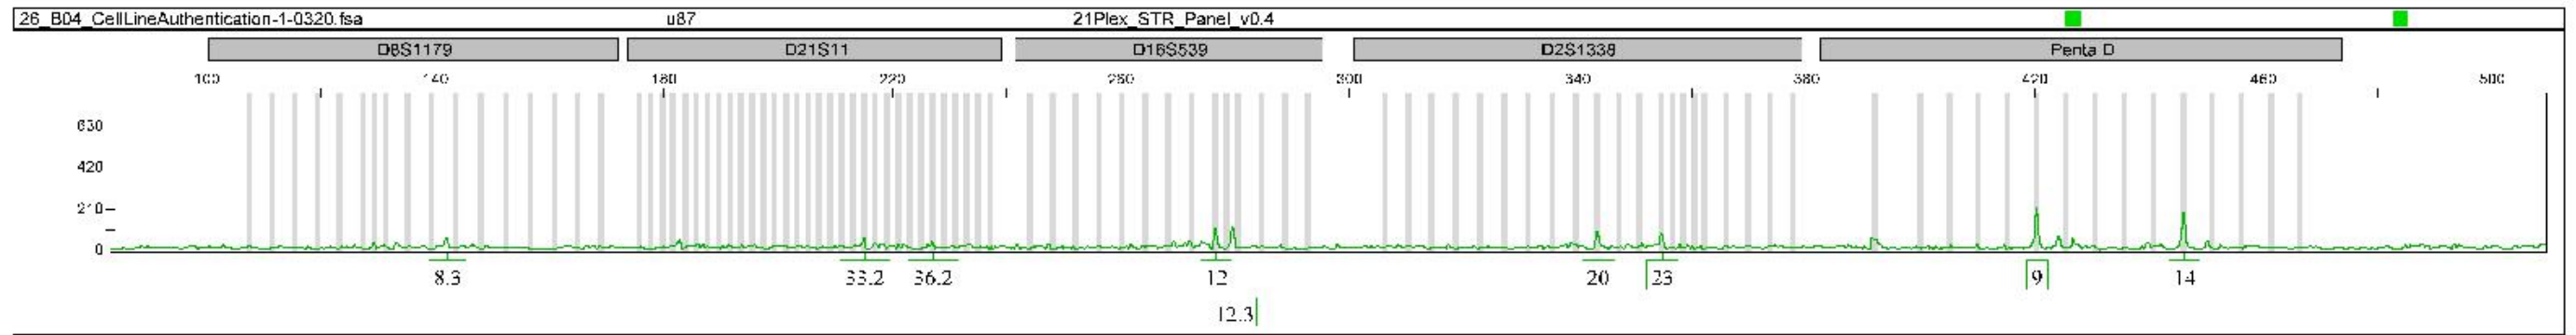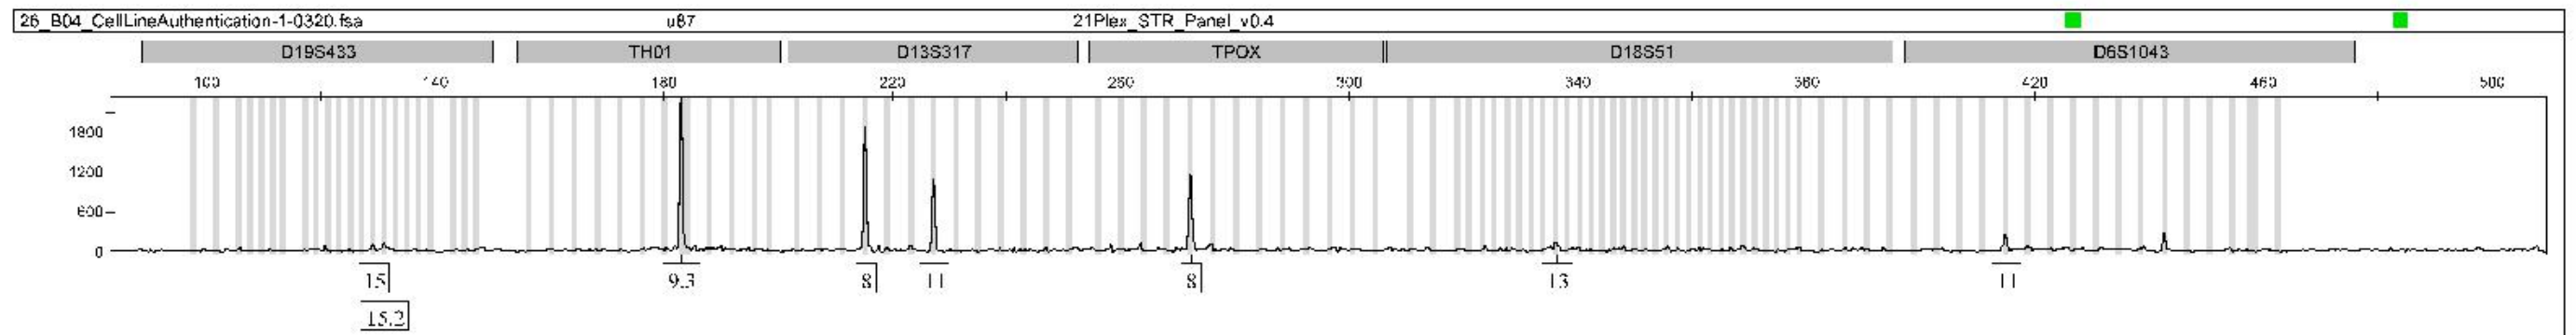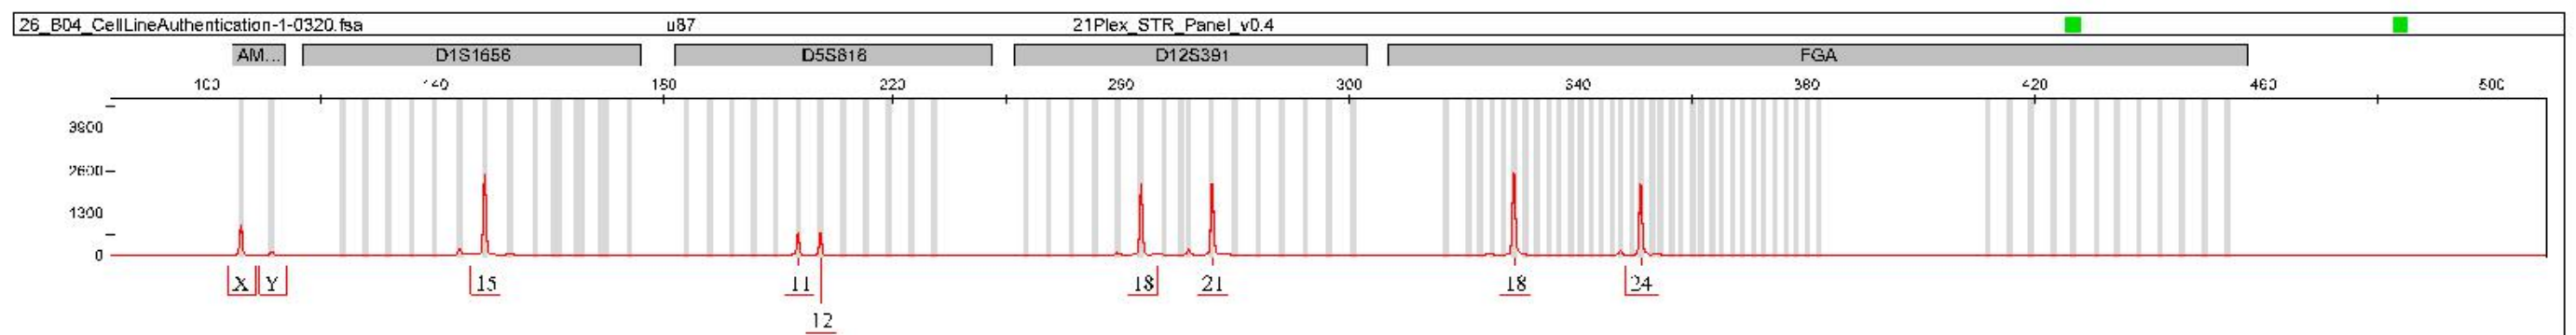

Supplement: Supplementary file 1 [file get_supplementary_file.php]
